# Supplementary material for: Endothelial VEGFR2-PLCγ signaling regulates vascular permeability and antitumor immunity through eNOS/Src
Source: PubMed Central journal article supplement (PMC10575733; doi:10.1172/jci161366), 2023-10-16

Supplemental data file 2. Flow cytometry gating strategies

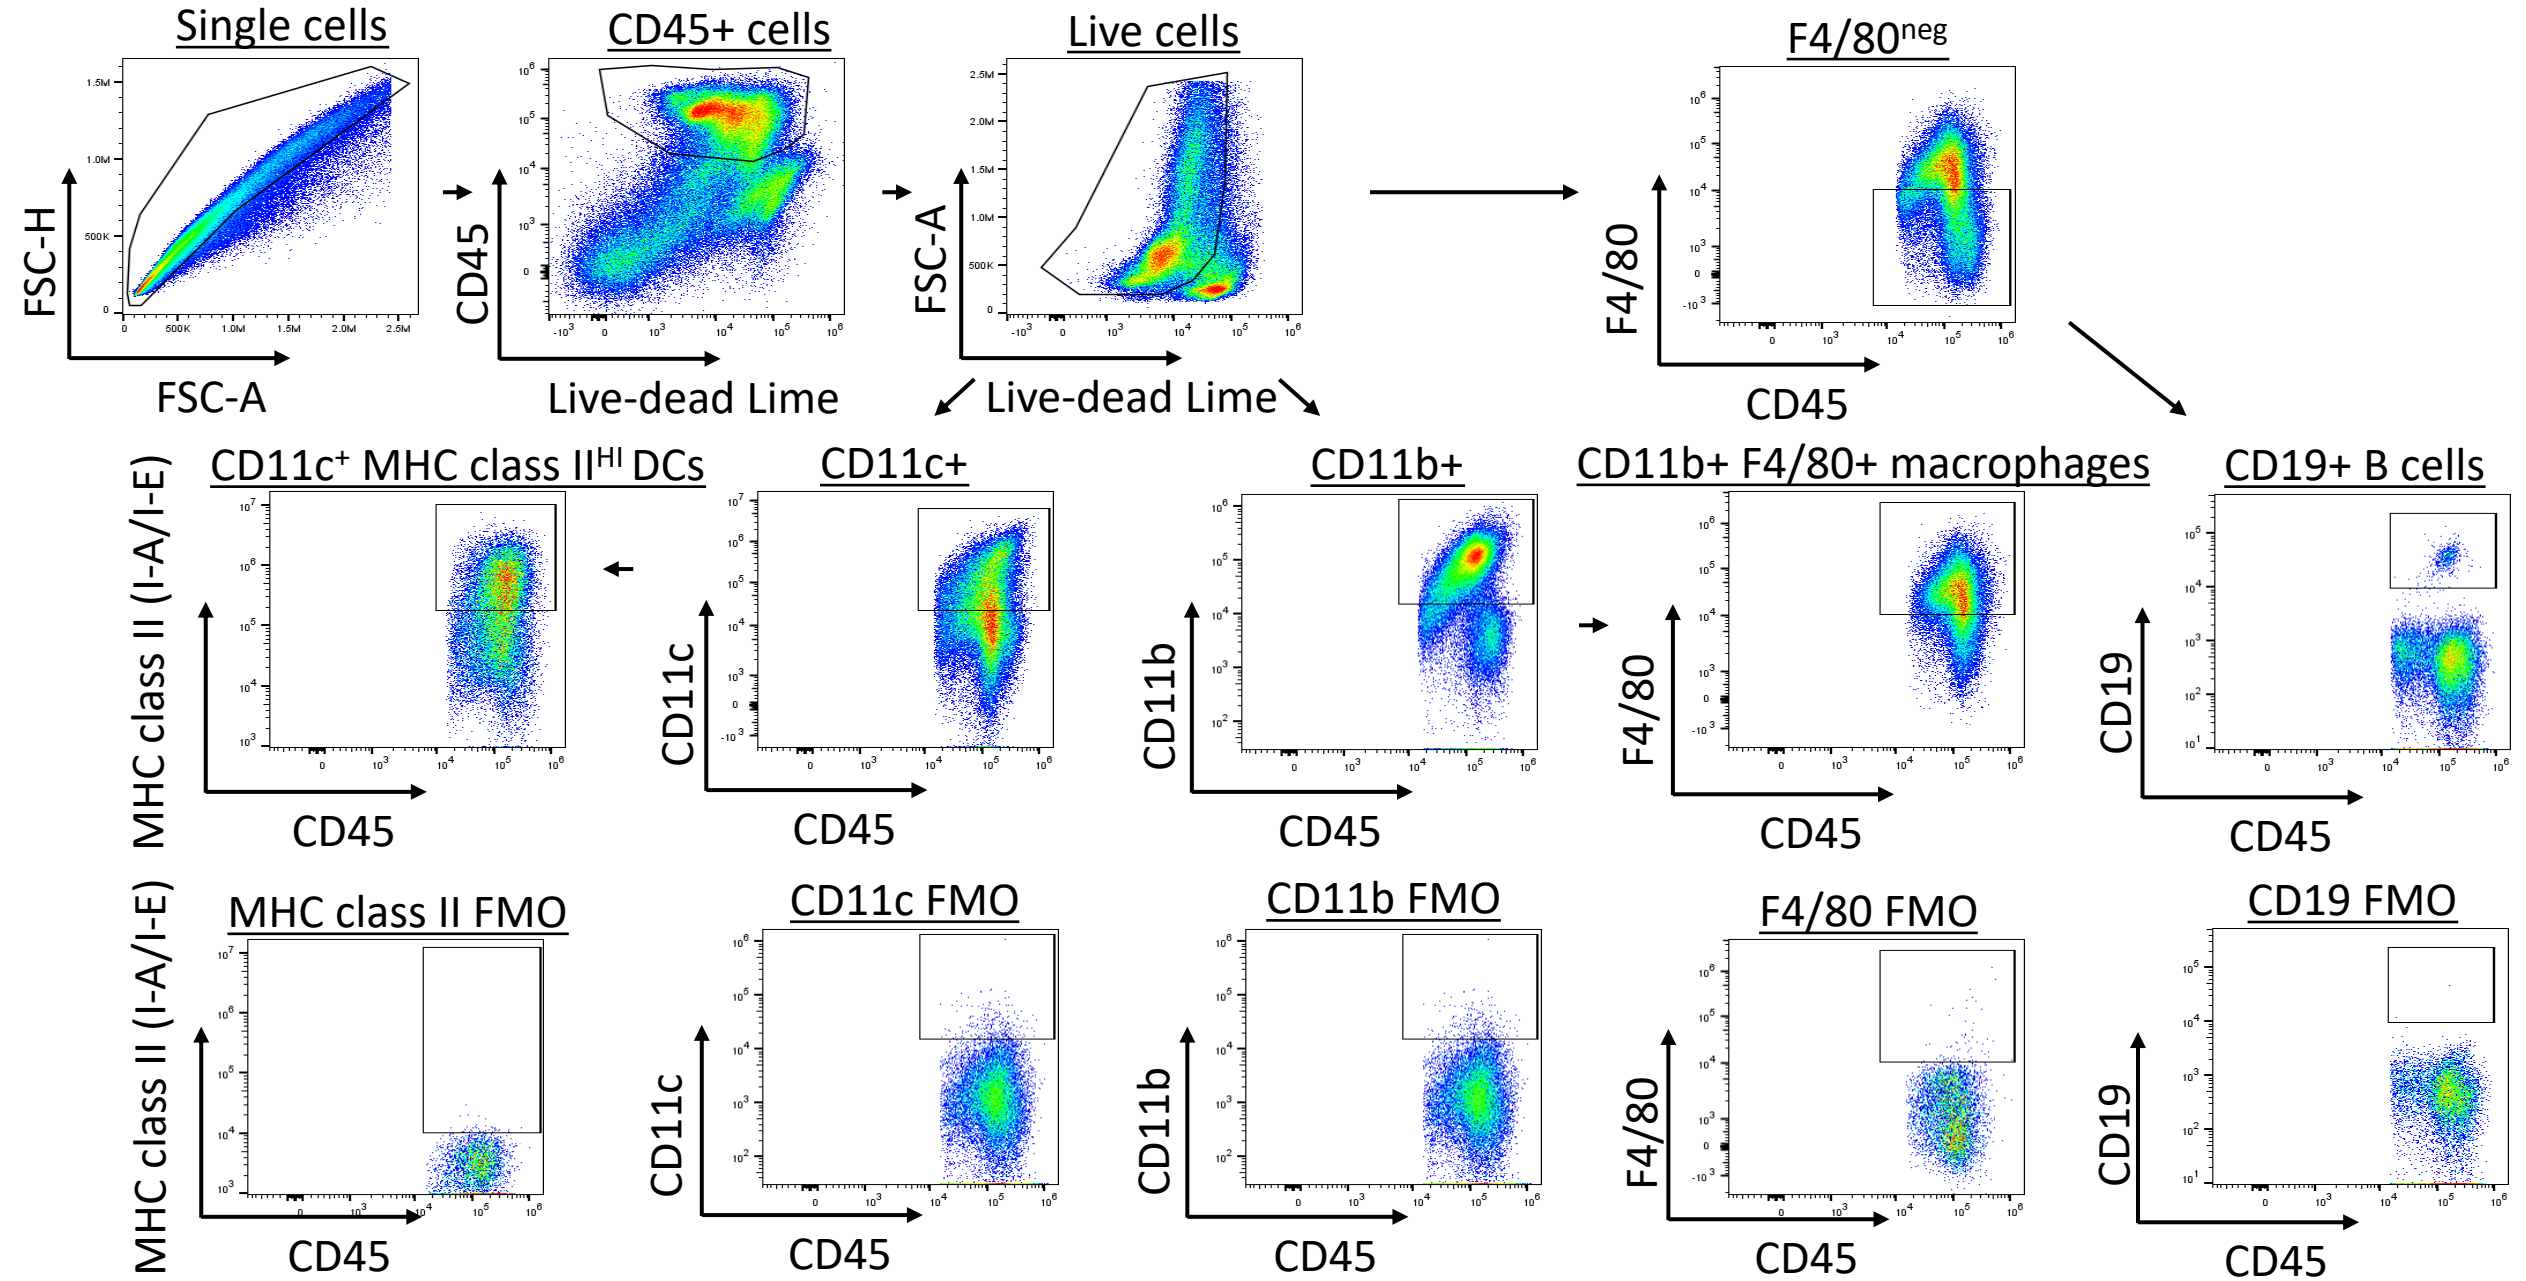

Supplemental data file 2. Flow cytometry gating strategies

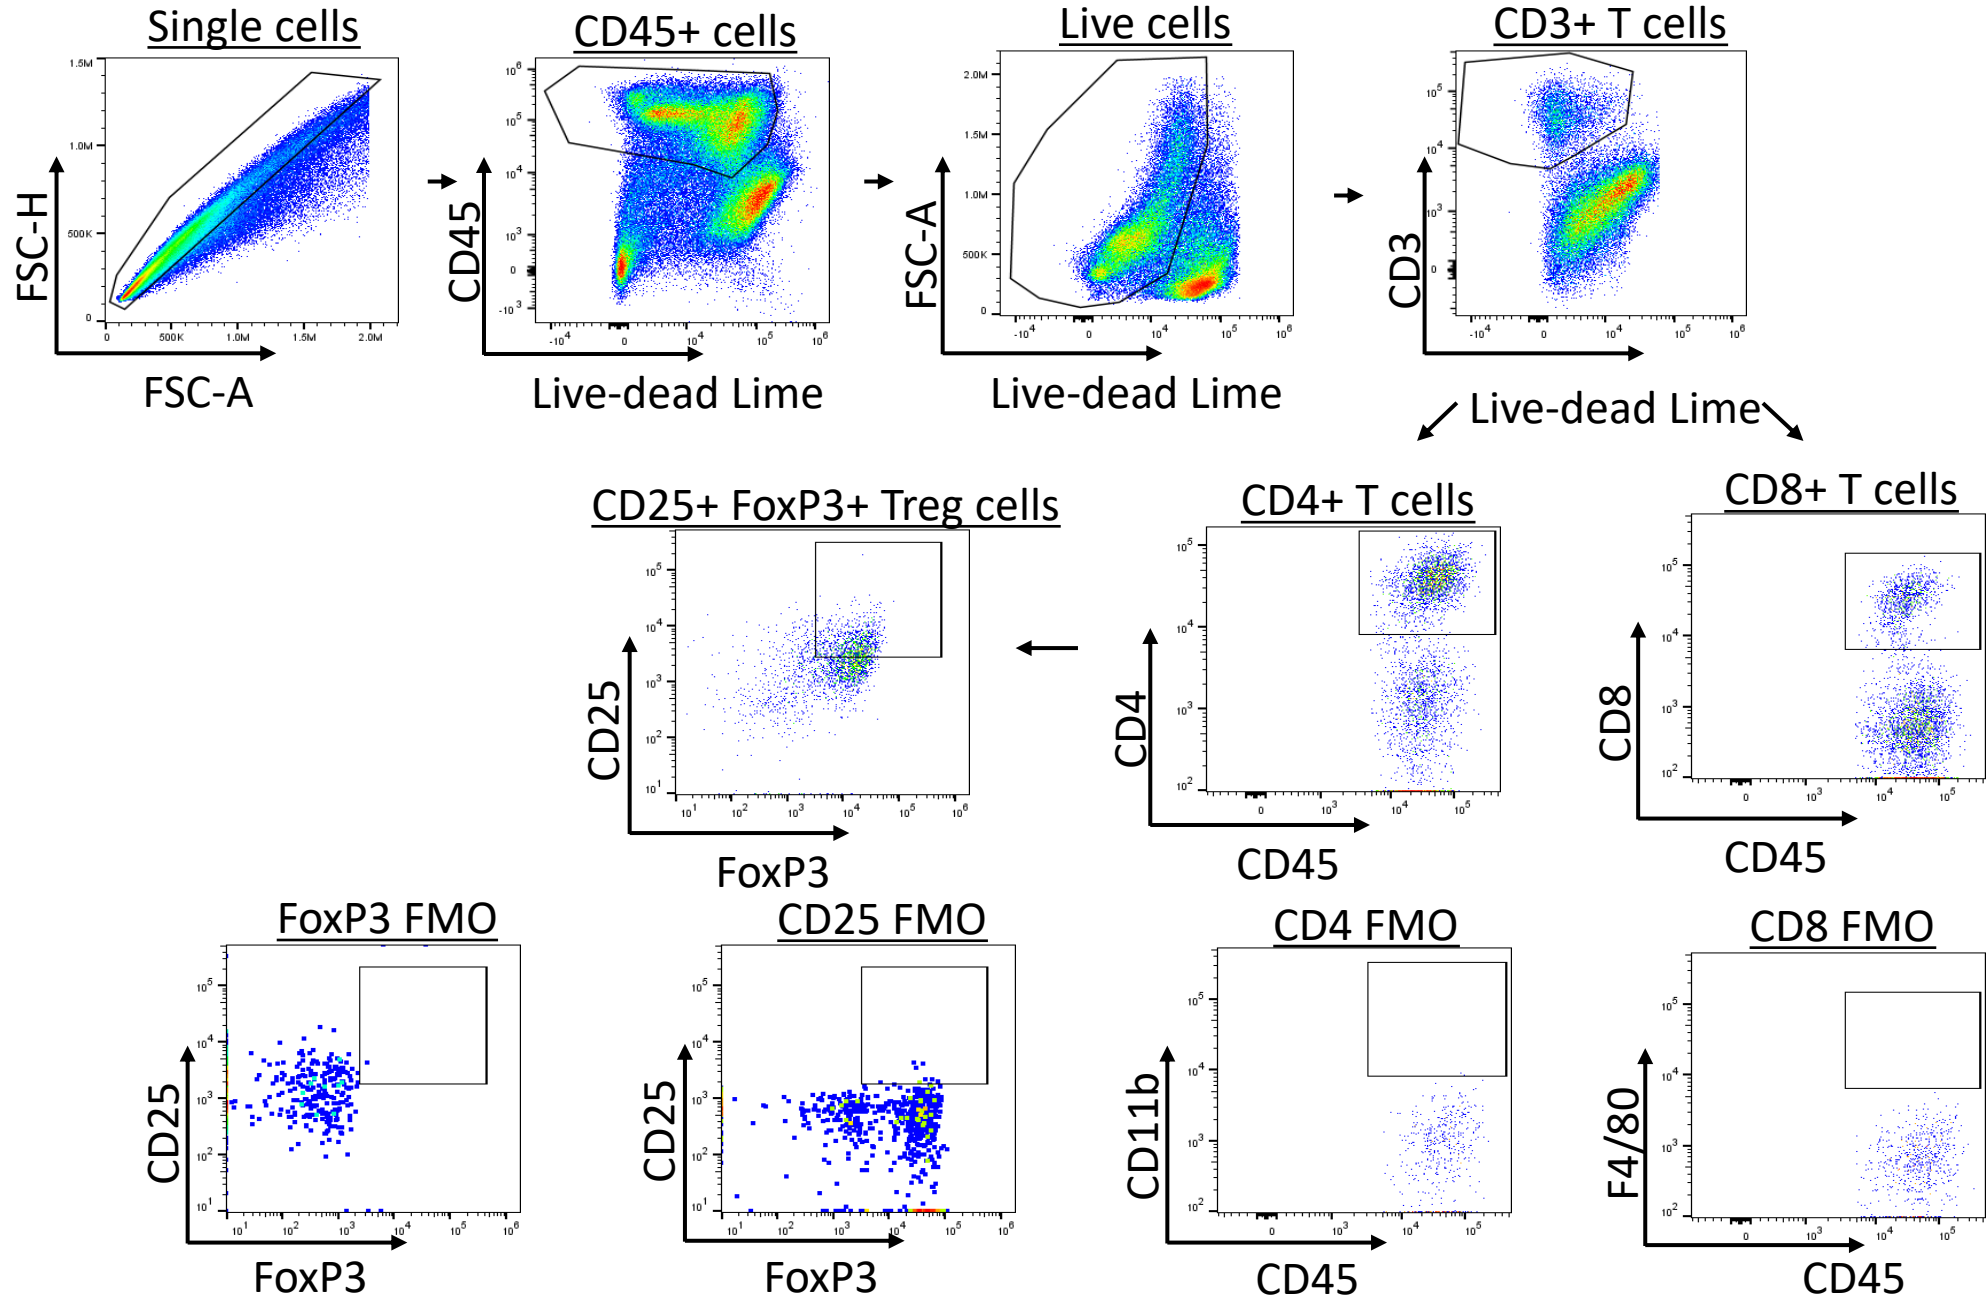

Supplement: jci-133-161366-s021.pdf [file jci-133-161366-s021.pdf]
